# Systematic review of survival after acute mesenteric ischaemia according to disease aetiology

I. G. Schoots<sup>1,2</sup>, G. I. Koffeman<sup>1</sup>, D. A. Legemate<sup>1</sup>, M. Levi<sup>2</sup> and T. M. van Gulik<sup>1</sup>

Departments of <sup>1</sup>Surgery and <sup>2</sup>Vascular and Internal Medicine, Academic Medical Centre, University of Amsterdam, Amsterdam, The Netherlands

Correspondence to: Dr T. M. van Gulik, Department of Surgery, Surgical Laboratory, IWO-1-155, Academic Medical Centre, University of Amsterdam, Meibergdreef 9, 1105 AZ, Amsterdam, The Netherlands (e-mail: t.m.vangulik@amc.uva.nl)

**Background:** Differentiation of acute mesenteric ischaemia on the basis of aetiology is of great importance because of variation in disease progression, response to treatment and outcome. The aim of this study was to analyse the published data on survival following acute mesenteric ischaemia over the past four decades in relation to disease aetiology and mode of treatment.

**Method:** A systematic review of the available literature from 1966 to 2002 was performed.

**Results:** Quantitative analysis of data derived from 45 observational studies containing 3692 patients with acute mesenteric ischaemia showed that the prognosis after acute mesenteric venous thrombosis is better than that following acute arterial mesenteric ischaemia; the prognosis after mesenteric arterial embolism is better than that after arterial thrombosis or non-occlusive ischaemia; the mortality rate following surgical treatment of arterial embolism and venous thrombosis (54.1 and 32.1 per cent respectively) is less than that after surgery for arterial thrombosis and non-occlusive ischaemia (77.4 and 72.7 per cent respectively); and the overall survival after acute mesenteric ischaemia has improved over the past four decades.

**Conclusion:** There are large differences in prognosis after acute mesenteric ischaemia depending on aetiology. Surgical treatment of arterial embolism has improved outcome whereas the mortality rate following surgery for arterial thrombosis and non-occlusive ischaemia remains poor.

Paper accepted 10 November 2003

Published online in Wiley InterScience (www.bjs.co.uk). DOI: 10.1002/bjs.4459

## Introduction

Despite considerable advances in medical diagnosis and treatment over the past four decades, mesenteric vascular occlusion still has a poor prognosis with an in-hospital mortality rate of 59–93 per cent<sup>1</sup>. The pessimistic view offered by Cokkinis more than 75 years ago<sup>2</sup>, namely that ‘...the diagnosis is impossible, the prognosis hopeless and the treatment useless...’, seems to remain valid up to the present day. Whether an aggressive approach to acute mesenteric ischaemia, consisting of early diagnosis, restoration of arterial perfusion to the ischaemic intestine, resection of the necrotic intestine, second-look laparotomy and supportive intensive care<sup>3</sup>, has improved survival during the past decades is unclear from the literature<sup>4,5</sup>. Several factors underlie this uncertainty. The aetiology of acute mesenteric ischaemia is often undefined in reported studies, as the correct diagnosis can usually only be confirmed at autopsy. This information is often not

available. Furthermore, the relative infrequency of acute mesenteric ischaemia (1–2 per 1000 hospital admissions)<sup>6</sup> and the varied clinical presentation constitute an almost insurmountable obstacle to undertaking randomized or case-control trials.

Mesenteric ischaemia can be classified grossly into ischaemia of thrombotic or non-thrombotic origin. Non-occlusive mesenteric ischaemia, the dominant non-thrombotic cause of acute mesenteric ischaemia, results from low-flow states (for example cardiogenic shock, sepsis, hypovolaemia) whereas thrombotic conditions include arterial embolism, arterial thrombosis and mesenteric venous thrombosis.

Systematic evaluation of research results, even if only observational data and small case series are available, is necessary to move forward, certainly in view of the impact of improved imaging and current thrombolytic strategies. The aim of this systematic analysis of the literature

on acute mesenteric ischaemia was to investigate the relationships between disease aetiology (arterial embolism, arterial thrombosis, venous thrombosis and non-occlusive mesenteric ischaemia), mode of treatment and mortality.

## Patients and methods

### Inclusion and exclusion criteria

Studies were eligible for inclusion if patients with acute mesenteric ischaemia were divided into aetiological subsets (arterial embolism, arterial thrombosis, venous thrombosis and non-occlusive mesenteric ischaemia) and reported in conjunction with in-hospital mortality rates. Studies that reported data concerning only one aetiological subset were excluded, because they focused on aspects other than aetiology and mortality, such as patient and clinical characteristics, risk factors and diagnostic methods. Patients with acute mesenteric ischaemia secondary to arteritis, mechanical obstruction, adhesion or aortic aneurysm repair, or caused by occlusion of the inferior mesenteric artery (ischaemic colitis), were excluded. Studies dealing with chronic mesenteric ischaemia were also excluded. All studies included had to provide information on the methods used to ascertain the diagnosis (angiography, laparotomy, histopathology or autopsy).

### Search strategy

Two authors independently performed a formal computer-assisted search of the medical databases Medline (January 1966 to January 2002, search updated to August 2002), Cochrane Database of Systematic Reviews, Cochrane Clinical Trial Register and Embase (January 1988 to January 2002). Keywords and medical subject heading (MeSH) terms used were 'mesenteric vascular occlusion', 'mesentery' and 'ischemia', limited to 'human' studies; clinical studies written in English, Spanish, German, French and Italian were identified. A manual cross-reference search of the eligible papers was performed to identify additional relevant articles. Data quoted as unpublished or data from abstracts were not used.

### Data collection

Two authors independently assessed the selected studies and extracted data on study design (retrospective, prospective), population, aetiology and outcome measures, and judged whether the publication met the stated inclusion criteria. Retrospective data were defined as those extracted from patient charts or routine data sources. Prospective data were defined as specific information the collection of

which started before disease diagnosis in specified patients. Disagreements concerning inclusion of studies and data extraction were resolved by group discussion. The checklist proposed by the Meta-analysis Of Observational Studies in Epidemiology (MOOSE) group<sup>7</sup> was used as a guideline for performing this quantitative analysis. Observational studies were defined as reports that used data from existing databases, cross-sectional studies, case series, case-control studies, or studies with a historical control or a cohort design<sup>7</sup>.

### Aetiological subsets

Patient data from each study were divided into the following aetiological subsets: superior mesenteric artery embolism, superior mesenteric artery thrombosis, mesenteric venous thrombosis and non-occlusive mesenteric ischaemia. When no distinction in aetiological origin was made between superior mesenteric artery embolism and artery thrombosis, patients were included in the group 'artery embolism and artery thrombosis'.

### Mortality

Mortality was defined as in-hospital death, and was categorized according to the defined aetiological subsets and analysed from 1966 to 2002. The median years of the inclusion period of each included study were used as independent variables in the regression analysis.

### Treatment strategy

To discriminate between the outcomes of various treatment strategies, data on treatment modalities (when available) were divided into treatment subsets: 'supportive care', 'exploratory laparotomy', 'resection', 'revascularization' and 'revascularization with resection'. Patients were included in the group 'resection, revascularization or both' when type of surgical intervention was not clearly stated. Supportive care was defined as conservative treatment without diagnostic or surgical intervention. Supportive care was used in patients who refused surgery, in patients who did not qualify for operation, or in those whose condition improved during diagnostic follow-up. A diagnostic exploratory laparotomy only was performed when total necrosis of the small and large bowel was found, in which case resection would be incompatible with life. Patients who were included in the subset 'resection' underwent resection of varying lengths of small bowel with or without large bowel resection during primary laparotomy or subsequent relaparotomy. The subset 'revascularization' included patients who underwent embolectomy, thrombectomy, patch angioplasty, endarterectomy or aortoiliac-mesenteric bypass with or

without autologous material. The authors were not able to specify the subdivision of each individual surgical procedure, owing to lack of data. Patients who were included in the subset 'revascularization and resection' underwent revascularization of the splanchnic circulation and subsequent resection of part of the large and/or small bowel, during the same operation or during subsequent relaparotomy.

### Prognostic studies

Prognostic studies which contained all patients with acute mesenteric ischaemia, including those treated with supportive care or diagnosed at autopsy, were distinguished from prognostic studies in which patients treated with supportive care were not included. This subdivision was made on the assumption that inclusion of patients treated with supportive care only, who were most often moribund or not eligible for interventional treatment, might influence survival negatively.

### Statistical analysis

The primary outcome measure was the in-hospital mortality rate according to aetiological subsets in the individual studies. A relative risk for mortality was calculated. The statistical heterogeneity of the included studies was assessed with the  $\chi^2$  test with  $k - 1$  degrees of freedom. Estimates of mortality risk in the aetiological subsets were expressed as pooled relative risks using either the fixed-effects model according to Mantel and Haenszel<sup>8</sup> or the random-effects model according to DerSimonian and Laird<sup>9</sup>, depending on the degree of heterogeneity of the included studies. When significant heterogeneity was found, the random-effects method was used to calculate the pooled relative risk.  $P$  values were calculated with the  $\chi^2$  test;  $P < 0.050$  was considered statistically significant. Data analysis was performed using Review Manager<sup>®</sup> 4.1 software (Cochrane Collaboration, Oxford, UK).

## Results

### Excluded studies

The initial search yielded 933 articles of which 863 did not meet the inclusion criteria. The majority of the excluded papers covered a variety of topics, including diagnostic modalities and treatment strategies. Other excluded articles comprised review articles, articles on chronic mesenteric ischaemia or papers lacking data on aetiology. Retrieval of the 70 candidate papers led to the exclusion of a further 25 because of insufficient data on aetiology<sup>10–21</sup>, unclear primary endpoints<sup>22–27</sup>, publication of the same

dataset in two languages<sup>28</sup>, or because data on acute and chronic mesenteric ischaemia or bowel strangulation<sup>29–34</sup> was published.

### Included studies

The 45 studies<sup>35–79</sup> included in the analysis are listed chronologically in *Table 1*. Only observational studies were identified, of which one was prospective and 44 were retrospective case series, published between 1967 and 2002. The total number of patients was 3692 with a female : male ratio of 1.06.

### Clinical characteristics

The median (range) ages of patients in the different aetiological subsets were comparable: 69 (60–75) years for those with arterial embolism ( $n = 280$ ), 71 (59–78) years for patients with arterial thrombosis ( $n = 264$ ), 70 (43–74) years for patients with venous thrombosis ( $n = 108$ ) and 69 (57–76) years for patients with non-occlusive mesenteric ischaemia ( $n = 152$ ). In the subsets of arterial embolism, arterial thrombosis and non-occlusive mesenteric ischaemia, there were more females than males, but the female : male ratios in these subsets were not significantly different ( $\chi^2$  test): 1.23 for arterial embolism ( $n = 268$ ), 1.46 for arterial thrombosis ( $n = 244$ ), 0.78 for venous thrombosis ( $n = 41$ ) and 1.17 for non-occlusive mesenteric ischaemia ( $n = 117$ ).

### Mortality

Mortality was expressed as in-hospital death in all studies. The overall mortality rates of patients within the aetiological subsets in the two groups of prognostic studies, either with or without patients treated with supportive care, were mean (range) 74 (33–95) and 64 (24–85) per cent respectively (*Table 2*). Mean mortality rates for the aetiological subsets in the two groups were 71 (36–100) and 66 (18–88) per cent for arterial embolism, 87 (33–100) and 70 (27–100) per cent for arterial thrombosis, 44 (0–100) and 44 (25–69) per cent for venous thrombosis, and 80 (17–100) and 70 (50–83) per cent for non-occlusive ischaemia, respectively. Mortality rates within the aetiological subsets of the group of studies that included patients treated with supportive care were higher than those in the group that excluded such patients (except for patients with mesenteric venous thrombosis); however, the latter group comprised solely studies from the past 25 years.

The results of quantitative analysis of in-hospital mortality according to disease aetiology, as measured by the pooled relative risks of two aetiological subsets,

**Table 1** Characteristics of patients included in studies of acute mesenteric ischemia

| Reference                                                                                     | Year | Country     | Inclusion period | No. of patients | Sex ratio (F : M) | Age (years)* | Study design  |
|-----------------------------------------------------------------------------------------------|------|-------------|------------------|-----------------|-------------------|--------------|---------------|
| Prognostic studies of acute mesenteric ischaemia including patients receiving supportive care |      |             |                  |                 |                   |              |               |
| Ottinger and Austen <sup>35</sup>                                                             | 1967 | USA         | 1960–1965        | 128             | 79 : 49           | 74 (3–95)    | Retrospective |
| Schennach and Dorfmann <sup>36</sup>                                                          | 1972 | Austria     | 1964–1971        | 32              | —                 | —            | Retrospective |
| Slater and Elliott <sup>37</sup>                                                              | 1972 | USA         | 1961–1971        | 18              | 7 : 11            | 67 (50–94)   | Retrospective |
| Bergan <i>et al.</i> <sup>38</sup>                                                            | 1975 | USA         | 1955–1974        | 48              | 26 : 22           | —            | Retrospective |
| Havia and Inberg <sup>39</sup>                                                                | 1975 | Germany     | 1957–1971        | 82              | 42 : 40           | 70 (30–88)   | Retrospective |
| Hansen and Christoffersen <sup>40</sup>                                                       | 1976 | Denmark     | 1964–1973        | 56              | 29 : 27           | 69           | Retrospective |
| Smith and Patterson <sup>41</sup>                                                             | 1976 | USA         | 1968–1973        | 23              | 13 : 10           | —            | Retrospective |
| Boley <i>et al.</i> <sup>42</sup>                                                             | 1977 | USA         | 1972–1976        | 33              | —                 | (51–88)      | Retrospective |
| Kairaluoma <i>et al.</i> <sup>43</sup>                                                        | 1977 | Finland     | 1961–1974        | 51              | 19 : 32           | 65 (40–90)   | Retrospective |
| Vellar and Doyle <sup>44</sup>                                                                | 1977 | Australia   | 1958–1975        | 52              | 28 : 24           | —            | Retrospective |
| Hertzer <i>et al.</i> <sup>45</sup>                                                           | 1978 | USA         | 1968–1977        | 10              | 6 : 4             | 60 (47–79)†  | Retrospective |
| Krausz and Manny <sup>46</sup>                                                                | 1978 | Israel      | 1952–1976        | 40              | 15 : 25           | (17–84)      | Retrospective |
| Ottinger <sup>47</sup>                                                                        | 1978 | USA         | 1964–1975        | 103             | 65 : 38           | 70†          | Retrospective |
| Rogers <i>et al.</i> <sup>48</sup>                                                            | 1982 | USA         | 1955–1981        | 11              | 7 : 4             | 61 (34–74)   | Retrospective |
| Sachs <i>et al.</i> <sup>49</sup>                                                             | 1982 | USA         | 1965–1980        | 44              | 21 : 23           | 67 (40–86)   | Retrospective |
| Andersson <i>et al.</i> <sup>50</sup>                                                         | 1984 | Sweden      | 1969–1982        | 60              | 29 : 31           | 78 (56–92)   | Retrospective |
| Koveker <i>et al.</i> <sup>51</sup>                                                           | 1985 | Germany     | 1979–1984        | 39              | 21 : 18           | 72           | Retrospective |
| Bergan <i>et al.</i> <sup>52</sup>                                                            | 1987 | USA         | 1983–1986        | 20              | 9 : 11            | 70 (31–84)   | Retrospective |
| Clavien <i>et al.</i> <sup>53</sup>                                                           | 1987 | Switzerland | 1968–1984        | 81              | 44 : 37           | 71 (27–89)†  | Retrospective |
| Giulini <i>et al.</i> <sup>54</sup>                                                           | 1987 | Italy       | 1982–1986        | 34              | 15 : 19           | 73 (43–84)   | Retrospective |
| Wilson <i>et al.</i> <sup>55</sup>                                                            | 1987 | UK          | 1973–1984        | 102             | 56 : 46           | 66 (38–89)   | Retrospective |
| Mishima <sup>56</sup>                                                                         | 1988 | Japan       | 1981–1985        | 163             | —                 | —            | Retrospective |
| Kach and Largiader <sup>57</sup>                                                              | 1989 | Switzerland | 1976–1987        | 45              | 24 : 21           | 71           | Retrospective |
| Inderbitzi <i>et al.</i> <sup>58</sup>                                                        | 1992 | Switzerland | 1973–1990        | 100             | 54 : 46           | 72 (44–89)†  | Retrospective |
| Järvinen <i>et al.</i> <sup>59</sup>                                                          | 1994 | Finland     | 1972–1990        | 214             | 106 : 108         | 75 (50–98)†  | Retrospective |
| Voltolini <i>et al.</i> <sup>60</sup>                                                         | 1996 | Italy       | 1979–1992        | 47              | 33 : 47           | 72 (47–88)   | Retrospective |
| Czerny <i>et al.</i> <sup>61</sup>                                                            | 1997 | Austria     | 1979–1996        | 145             | 70 : 75           | 68 (45–86)   | Retrospective |
| Ritz <i>et al.</i> <sup>62</sup>                                                              | 1997 | Germany     | 1979–1995        | 141             | 80 : 61           | 72 (31–93)†  | Retrospective |
| Duron <i>et al.</i> <sup>63</sup>                                                             | 1998 | France      | 1980–1985        | 492             | 249 : 243         | 70 (18–96)   | Retrospective |
|                                                                                               |      |             | 1990–1995        | 305             | 157 : 148         | 71 (16–102)  | Retrospective |
| Urayama <i>et al.</i> <sup>64</sup>                                                           | 1998 | Japan       | 1978–1995        | 39              | 14 : 25           | 62           | Retrospective |
| Mamode <i>et al.</i> <sup>65</sup>                                                            | 1999 | UK          | 1987–1993        | 57              | 35 : 22           | 68 (37–91)   | Retrospective |
| Endean <i>et al.</i> <sup>66</sup>                                                            | 2001 | USA         | 1993–2000        | 58              | 32 : 26           | 61 (20–91)   | Retrospective |
| Subtotal                                                                                      |      |             |                  | 2873            | 1385 : 1293       |              |               |
| Prognostic studies of acute mesenteric ischaemia excluding patients receiving supportive care |      |             |                  |                 |                   |              |               |
| Rius <i>et al.</i> <sup>67</sup>                                                              | 1979 | Spain       | 1967–1977        | 46              | 19 : 27           | 65 (24–90)   | Retrospective |
| Braun <sup>68</sup>                                                                           | 1985 | Germany     | 1974–1984        | 52              | 33 : 19           | 73           | Retrospective |
| Riemenschneider <i>et al.</i> <sup>69</sup>                                                   | 1987 | Germany     | 1966–1986        | 105             | 57 : 48           | 71           | Retrospective |
| Sitges-Serra <i>et al.</i> <sup>70</sup>                                                      | 1987 | Spain       | 1976–1985        | 83              | 30 : 53           | 67           | Retrospective |
| Macarone Palmieri <i>et al.</i> <sup>71</sup>                                                 | 1989 | Italy       | 1977–1988        | 64              | 34 : 30           | 70 (24–92)   | Retrospective |
| Levy <i>et al.</i> <sup>72</sup>                                                              | 1990 | Israel      | 1977–1987        | 45              | —                 | —            | Retrospective |
| Bottger <i>et al.</i> <sup>73</sup>                                                           | 1991 | Germany     | 1985–1989        | 46              | 22 : 24           | 67           | Prospective   |
| Grothues <i>et al.</i> <sup>74</sup>                                                          | 1996 | Germany     | 1972–1993        | 90              | 36 : 54           | 57           | Retrospective |
| Newman <i>et al.</i> <sup>75</sup>                                                            | 1998 | USA         | 1990–1996        | 71              | —                 | —            | Retrospective |
| Meyer <i>et al.</i> <sup>76</sup>                                                             | 1998 | Germany     | 1988–1994        | 35              | 19 : 16           | 71 (43–95)†  | Retrospective |
| Bjorck <i>et al.</i> <sup>77</sup>                                                            | 2002 | Sweden      | 1987–1998        | 60              | 35 : 25           | 76 (35–90)†  | Retrospective |
| Luther <i>et al.</i> <sup>78</sup>                                                            | 2002 | Germany     | 1979–2002        | 64              | 31 : 33           | 64 (30–89)†  | Retrospective |
| Park <i>et al.</i> <sup>79</sup>                                                              | 2002 | USA         | 1990–1996        | 58              | 36 : 22           | 67 (35–96)   | Retrospective |
| Subtotal                                                                                      |      |             |                  | 819             | 352 : 351         |              |               |
| Total                                                                                         |      |             |                  | 3692            | 1737 : 1644       |              |               |

\*Values are mean or †median (range).

**Table 2** In-hospital deaths according to aetiology of acute mesenteric ischaemia over the past four decades

|                                                                                               |      | Mortality rate    |                    |                   |                   |                   |                      |                  |
|-----------------------------------------------------------------------------------------------|------|-------------------|--------------------|-------------------|-------------------|-------------------|----------------------|------------------|
| Reference                                                                                     | Year | AE and AT         | AE                 | AT                | VT                | NMI               | Overall              |                  |
| Prognostic studies of acute mesenteric ischaemia including patients receiving supportive care |      |                   |                    |                   |                   |                   |                      |                  |
| 35                                                                                            | 1967 | 45 of 53 (84.9)   | 22 of 29 (75.8)    | 21 of 22 (95)     | 8 of 10 (80)      | 67 of 67 (100)    | 118 of 128 (92.2)    |                  |
| 36                                                                                            | 1972 |                   | 13 of 18 (72.2)    | 11 of 11 (100)    | 0 of 0            | 3 of 3 (100)      | 27 of 32 (84.4)      |                  |
| 37                                                                                            | 1972 |                   | 1 of 1 (100)       | 3 of 3 (100)      | 2 of 3 (6.7)      | 7 of 7 (100)      | 17 of 18 (94.4)*     |                  |
| 38                                                                                            | 1975 |                   | 23 of 33 (69.7)    | 15 of 15 (100)    | Excl.             | Excl.             | 38 of 48 (79.2)      |                  |
| 39                                                                                            | 1975 |                   | 50 of 52 (96.2)    | 18 of 20 (90.0)   | 8 of 10 (80.0)    | Excl.             | 76 of 82 (92.7)      |                  |
| 40                                                                                            | 1976 |                   | 7 of 7 (100)       | 31 of 32 (96.9)   | 5 of 8 (62.5)     | 0 of 0            | 53 of 56 (94.6)*     |                  |
| 41                                                                                            | 1976 |                   | 6 of 7 (85.7)      | 9 of 10 (90.0)    | 3 of 3 (100)      | 3 of 3 (100)      | 21 of 23 (91.3)      |                  |
| 42                                                                                            | 1977 |                   | 9 of 16 (56.3)     | 1 of 3 (33.3)     | 0 of 1 (0)        | 4 of 13 (30.8)    | 14 of 33 (42.4)      |                  |
| 43                                                                                            | 1977 |                   | 10 of 11 (90.9)    | 19 of 21 (90.5)   | 0 of 1 (0)        | 6 of 14 (42.9)    | 38 of 51 (74.5)*     |                  |
| 44                                                                                            | 1977 |                   | 6 of 9 (66.7)      | 31 of 32 (96.9)   | 3 of 5 (60.0)     | 4 of 6 (66.7)     | 44 of 52 (84.6)      |                  |
| 45                                                                                            | 1978 |                   | 4 of 7 (57.1)      | 2 of 2 (100)      | 0 of 0            | 1 of 1 (100)      | 7 of 10 (70.0)       |                  |
| 46                                                                                            | 1978 |                   | 12 of 17 (70.6)    | 19 of 23 (82.6)   | 0 of 0            | 0 of 0            | 31 of 40 (77.5)      |                  |
| 47                                                                                            | 1978 |                   | 44 of 57 (77.2)    | 44 of 46 (95.7)   | Excl.             | Excl.             | 88 of 103 (85.4)     |                  |
| 48                                                                                            | 1982 |                   | 5 of 8 (62.5)      | 1 of 1 (100)      | 0 of 0            | 2 of 2 (100)      | 8 of 11 (72.7)       |                  |
| 49                                                                                            | 1982 |                   | 9 of 14 (64.3)     | 12 of 12 (100)    | 4 of 11 (36.4)    | 5 of 7 (71.4)     | 30 of 44 (68.2)      |                  |
| 50                                                                                            | 1984 |                   | 45 of 53 (84.9)    |                   |                   | 4 of 7 (57.1)     | 0 of 0               | 49 of 60 (81.7)  |
| 51                                                                                            | 1985 |                   |                    | 16 of 19 (84.2)   | 12 of 13 (92.3)   | 1 of 2 (50.0)     | 4 of 5 (80.0)        | 33 of 39 (84.6)  |
| 52                                                                                            | 1987 |                   |                    | 5 of 6 (83.3)     | 6 of 8 (75.0)     | 0 of 0            | 6 of 6 (100)         | 17 of 20 (85.0)  |
| 53                                                                                            | 1987 |                   |                    | 28 of 33 (84.8)   | 14 of 15 (93.3)   | 5 of 9 (55.6)     | 10 of 15 (66.7)      | 61 of 81 (75.3)* |
| 54                                                                                            | 1987 |                   |                    | 8 of 12 (66.7)    | 4 of 6 (66.7)     | 1 of 1 (100)      | 3 of 5 (60.0)        | 25 of 34 (73.5)* |
| 55                                                                                            | 1987 |                   | 32 of 34 (94.1)    | 25 of 27 (92.6)   | Excl.             | 24 of 24 (100)    | 94 of 102 (92.2)*    |                  |
| 56                                                                                            | 1988 | 76 of 120 (63.3)  |                    |                   | 11 of 19 (57.9)   | 19 of 24 (79.2)   | 106 of 163 (65.0)    |                  |
| 57                                                                                            | 1989 |                   | 11 of 16 (68.8)    | 10 of 12 (83.3)   | 1 of 5 (20.0)     | 2 of 4 (50.0)     | 27 of 45 (60.0)*     |                  |
| 58                                                                                            | 1992 |                   | 39 of 55 (70.9)    | 14 of 15 (93.3)   | 6 of 19 (31.6)    | 4 of 6 (66.7)     | 68 of 100 (68.0)     |                  |
| 59                                                                                            | 1994 |                   | 56 of 67 (83.6)    | 119 of 127 (93.7) | 2 of 4 (50.0)     | 0 of 0            | 176 of 214 (82.2)*   |                  |
| 60                                                                                            | 1996 |                   | 5 of 14 (35.7)     | 18 of 20 (90.0)   | 2 of 4 (50.0)     | 9 of 9 (100)      | 34 of 47 (72.3)      |                  |
| 61                                                                                            | 1997 |                   | 43 of 93 (46.2)    | 28 of 40 (70.0)   | 3 of 5 (60.0)     | 5 of 7 (71.4)     | 79 of 145 (54.5)     |                  |
| 62                                                                                            | 1997 |                   | 53 of 77 (68.8)    | 22 of 30 (73.3)   | 10 of 16 (62.5)   | 15 of 18 (83.3)   | 100 of 141 (70.9)    |                  |
| 63                                                                                            | 1998 |                   | 41 of 68 (60.3)    | 88 of 99 (88.9)   | 25 of 49 (51.0)   | 100 of 122 (82.6) | 380 of 492 (77.2)*   |                  |
|                                                                                               |      |                   | 34 of 55 (61.8)    | 35 of 56 (62.5)   | 9 of 47 (19.1)    | 57 of 77 (74.0)   | 185 of 305 (60.7)*   |                  |
| 64                                                                                            | 1998 | 10 of 25 (40.0)   |                    |                   | 1 of 8 (12.5)     | 1 of 6 (16.7)     | 13 of 39 (33.3)      |                  |
| 65                                                                                            | 1999 |                   | 9 of 12 (75.0)     | 16 of 18 (88.9)   | 2 of 4 (50.0)     | 6 of 8 (75.0)     | 46 of 57 (80.7)*     |                  |
| 66                                                                                            | 2001 |                   | 13 of 22 (59.1)    | 13 of 21 (61.9)   | 2 of 15 (13.3)    | Excl.             | 28 of 58 (48.2)      |                  |
| Subtotal                                                                                      |      | 131 of 198 (66.2) | 614 of 869 (70.7)  | 661 of 760 (87.0) | 118 of 266 (44.4) | 367 of 459 (80.0) | 2123 of 2873 (73.9)* |                  |
| Prognostic studies of acute mesenteric ischaemia excluding patients receiving supportive care |      |                   |                    |                   |                   |                   |                      |                  |
| 67                                                                                            | 1979 | 32 of 49 (65.3)   | 3 of 5 (60.0)      | 27 of 27 (100)    | 5 of 8 (62.5)     | 4 of 6 (66.7)     | 39 of 46 (84.7)      |                  |
| 68                                                                                            | 1985 |                   |                    |                   | Excl.             | Excl.             | 33 of 52 (63.5)      |                  |
| 69                                                                                            | 1987 |                   | 23 of 26 (88.5)    | 32 of 40 (80.0)   | 22 of 32 (68.8)   | Excl.             | 83 of 105 (79.0)*    |                  |
| 70                                                                                            | 1987 |                   | 4 of 6 (66.7)      | 16 of 19 (84.2)   | 2 of 7 (28.6)     | 2 of 3 (66.7)     | 59 of 83 (71.1)*     |                  |
| 71                                                                                            | 1989 |                   | 8 of 10 (80.0)     | 17 of 20 (85.0)   | 3 of 8 (37.5)     | 10 of 13 (76.9)   | 51 of 64 (79.7)*     |                  |
| 72                                                                                            | 1990 |                   | 3 of 17 (17.6)     | 3 of 11 (27.3)    | 5 of 17 (29.4)    | 0 of 0            | 11 of 45 (24.4)      |                  |
| 73                                                                                            | 1991 |                   | 7 of 10 (70.0)     | 10 of 17 (58.8)   | 6 of 17 (35.3)    | 1 of 2 (50.0)     | 24 of 46 (52.2)      |                  |
| 74                                                                                            | 1996 |                   | 16 of 21 (76.2)    | 22 of 27 (81.5)   | 11 of 30 (36.7)   | 10 of 12 (83.3)   | 59 of 90 (65.6)      |                  |
| 75                                                                                            | 1998 |                   | 9 of 11 (81.8)     | 9 of 13 (69.2)    | 1 of 4 (25.0)     | 27 of 43 (62.8)   | 46 of 71 (64.8)      |                  |
| 76                                                                                            | 1998 |                   | 22 of 35 (62.9)    |                   |                   | Excl.             | Excl.                | 22 of 35 (62.9)  |
| 77                                                                                            | 2002 | 31 of 60 (51.7)   |                    |                   | Excl.             | Excl.             | 31 of 60 (51.7)      |                  |
| 78                                                                                            | 2002 |                   | 14 of 18 (77.8)    | 13 of 19 (68.4)   | 3 of 9 (33.3)     | 4 of 5 (80.0)     | 43 of 64 (67.2)*     |                  |
| 79                                                                                            | 2002 |                   | 5 of 16 (31.3)     | 12 of 37 (32.4)   | Excl.             | 4 of 5 (80.0)     | 21 of 58 (36.2)      |                  |
| Subtotal                                                                                      |      | 85 of 144 (59.0)  | 92 of 140 (66.0)   | 161 of 230 (70.0) | 58 of 132 (44.0)  | 62 of 89 (70.0)   | 522 of 819 (63.7)*   |                  |
| Total                                                                                         |      | 216 of 342 (63.2) | 705 of 1010 (69.8) | 812 of 980 (82.9) | 177 of 394 (44.9) | 434 of 556 (78.1) | 2645 of 3692 (71.6)* |                  |

Values in parentheses are percentages AE, superior mesenteric artery embolism; AT, superior mesenteric artery thrombosis; VT, mesenteric vein thrombosis; NMI, non-occlusive mesenteric ischaemia; AE and AT, superior mesenteric artery embolism and superior mesenteric artery thrombosis included together; Excl, excluded. \*Patients with aetiology of acute mesenteric ischaemia unknown or other than AE, AT, VT or NMI are included.



**Table 3** Pooled relative risks of in-hospital death in relation to aetiology of acute mesenteric ischaemia

| Aetiology                                                                        | Mortality rate                | Relative risk     | P*      |
|----------------------------------------------------------------------------------|-------------------------------|-------------------|---------|
| Prognostic studies including patients receiving supportive care <sup>35–66</sup> |                               |                   |         |
| AE versus AT                                                                     | 619 of 874 versus 661 of 760  | 0.85 (0.78, 0.92) | < 0.001 |
| AE versus NMI                                                                    | 414 of 619 versus 347 of 429  | 0.86 (0.78, 0.95) | 0.004   |
| AT versus NMI                                                                    | 402 of 476 versus 347 of 429  | 1.01 (0.92, 1.10) | 0.842   |
| AE versus VT                                                                     | 481 of 694 versus 102 of 232  | 1.32 (1.05, 1.65) | 0.020   |
| AT versus VT                                                                     | 538 of 627 versus 102 of 232  | 1.59 (1.23, 2.05) | < 0.001 |
| NMI versus VT                                                                    | 331 of 423 versus 97 of 222   | 1.47 (1.22, 1.78) | < 0.001 |
| Prognostic studies excluding patients receiving supportive care <sup>67–79</sup> |                               |                   |         |
| AE versus AT                                                                     | 93 of 140 versus 161 of 230   | 1.02 (0.90, 1.16) | 0.734   |
| AE versus NMI                                                                    | 66 of 97 versus 62 of 87      | 1.00 (0.82, 1.21) | 1.000   |
| AT versus NMI                                                                    | 126 of 179 versus 63 of 89    | 0.99 (0.79, 1.24) | 0.936   |
| AE versus VT                                                                     | 87 of 124 versus 58 of 132    | 1.56 (1.21, 2.03) | < 0.001 |
| AT versus VT                                                                     | 149 of 193 versus 58 of 132   | 1.62 (1.25, 2.09) | < 0.001 |
| NMI versus VT                                                                    | 58 of 84 versus 31 of 83      | 1.91 (1.36, 2.70) | < 0.001 |
| All prognostic studies <sup>35–79</sup>                                          |                               |                   |         |
| AE versus AT                                                                     | 711 of 1014 versus 822 of 990 | 0.88 (0.82, 0.94) | < 0.001 |
| AE versus NMI                                                                    | 480 of 716 versus 409 of 518  | 0.88 (0.80, 0.97) | 0.007   |
| AT versus NMI                                                                    | 528 of 655 versus 409 of 518  | 1.01 (0.93, 1.09) | 0.865   |
| AE versus VT                                                                     | 568 of 818 versus 160 of 364  | 1.38 (1.10, 1.66) | < 0.001 |
| AT versus VT                                                                     | 677 of 810 versus 160 of 364  | 1.60 (1.32, 1.95) | < 0.001 |
| NMI versus VT                                                                    | 389 of 507 versus 128 of 305  | 1.54 (1.32, 1.80) | < 0.001 |

Values in parentheses are 95 per cent confidence intervals. AE, superior mesenteric artery embolism; AT, superior mesenteric artery thrombosis; VT, mesenteric vein thrombosis; NMI, non-occlusive mesenteric ischaemia. \* $\chi^2$  test.

**Table 4** Treatment and associated in-hospital death according to aetiology of acute mesenteric ischaemia

| Treatment                                            | Mortality rate    |                   |                   |                  |                   |                    |
|------------------------------------------------------|-------------------|-------------------|-------------------|------------------|-------------------|--------------------|
|                                                      | AE and AT         | AE                | AT                | VT               | NMI               | Overall            |
| Non-surgical treatment                               |                   |                   |                   |                  |                   |                    |
| Supportive care                                      | 27 of 29 (93.1)   | 47 of 50 (94.0)   | 36 of 36 (100)    | 11 of 13 (84.6)  | 68 of 79 (86.1)   | 189 of 207 (91.3)  |
| Explorative laparotomy                               | 52 of 52 (100)    | 88 of 90 (97.8)   | 123 of 124 (99.2) | 16 of 18 (88.9)  | 48 of 49 (98.0)   | 327 of 333 (98.2)  |
| Subtotal                                             | 79 of 81 (97.5)   | 135 of 140 (96.4) | 159 of 160 (99.4) | 27 of 31 (87.1)  | 116 of 128 (90.6) | 516 of 540 (95.6)  |
| Surgical treatment                                   |                   |                   |                   |                  |                   |                    |
| Resection                                            | 62 of 109 (56.9)  | 39 of 81 (48.1)   | 65 of 85 (76.5)   | 29 of 78 (37.2)  | 32 of 44 (72.8)   | 227 of 397 (57.2)  |
| Revascularization                                    | 14 of 31 (45.2)   | 40 of 67 (59.7)   | 22 of 30 (73.3)   | 2 of 11 (18.2)   | 0 of 0            | 78 of 139 (56.1)   |
| Revascularization + resection                        | 20 of 36 (53.6)   | 32 of 54 (59.3)   | 16 of 19 (84.2)   | 1 of 2 (50.0)    | 0 of 0            | 69 of 111 (62.2)   |
| Resection, revascularization or both (not specified) | 31 of 60 (51.7)   | 14 of 29 (48.3)   | 24 of 30 (80.0)   | 4 of 21 (19.0)   | 0 of 0            | 73 of 140 (52.1)   |
| Subtotal                                             | 127 of 236 (53.8) | 125 of 231 (54.1) | 127 of 164 (77.4) | 36 of 112 (32.1) | 32 of 44 (72.7)   | 447 of 787 (56.8)  |
| Total                                                | 206 of 317 (65.0) | 260 of 371 (70.1) | 286 of 324 (88.3) | 63 of 143 (44.0) | 148 of 172 (86.0) | 963 of 1327 (72.6) |

Values in parentheses are percentages. AE, superior mesenteric artery embolism; AT, superior mesenteric artery thrombosis; VT, mesenteric vein thrombosis; NMI, non-occlusive mesenteric ischaemia; AE and AT, superior mesenteric artery embolism and superior mesenteric artery thrombosis included together.

are presented in *Table 3*. The pooled mortality risk for mesenteric arterial thrombosis was equivalent to that for non-occlusive mesenteric ischaemia in both sets of studies. The pooled mortality risk from mesenteric arterial emboli was less than that from arterial thrombosis or non-occlusive

mesenteric ischaemia. The pooled mortality risk from venous thrombosis was lower than that from arterial causes of acute mesenteric ischaemia in both sets.

The mortality rates for each aetiological subset over the past four decades, obtained from weighted mortality rates

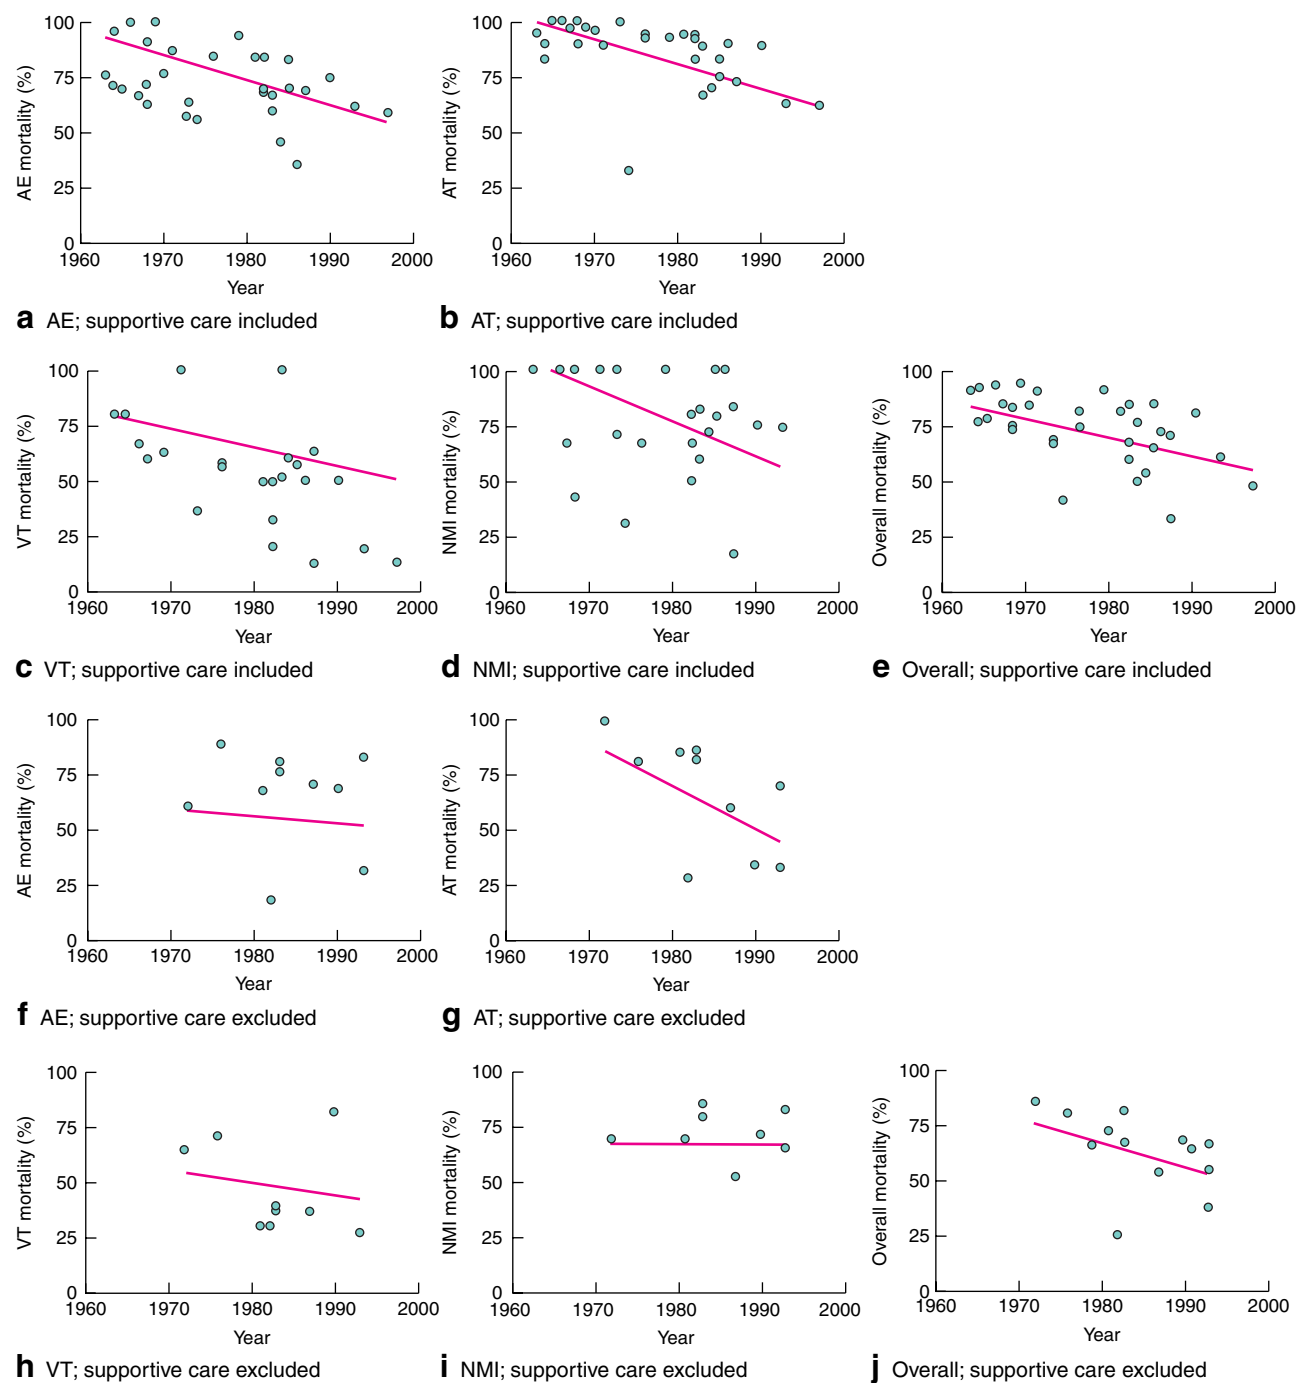

**Fig. 1** Trends in in-hospital mortality rate with time in relation to aetiology of acute mesenteric ischaemia. The median of the inclusion period of each included study was used in regression analysis, along with in-hospital mortality rates weighted according to the number of patients included in the study. AE, superior mesenteric artery embolism; AT, superior mesenteric artery thrombosis; VT, mesenteric vein thrombosis; NMI, non-occlusive mesenteric ischaemia; overall, mortality rates for all aetiological subsets combined

and the median year of the inclusion period, are shown in *Fig. 1*. In both groups, overall mortality rate, and also the mortality rates for the individual aetiological subsets of acute mesenteric ischaemia, demonstrated a declining trend over the past four decades.

### Surgical treatment

*Table 4* shows mortality rates of acute mesenteric ischaemia following surgical and non-surgical treatment according to the aetiological subsets. From the surgical perspective, it is necessary to analyse mortality rates following surgical treatment while excluding moribund patients or patients in whom the diagnosis was made at autopsy. Observational studies that included patients who did not receive surgical treatment<sup>35–66</sup> may obscure the effectiveness of surgical intervention. Therefore, patients were classified into treatment modalities and categorized into non-surgical or surgical treatment according to disease aetiology.

For non-surgical treatment, the mortality rates of the different aetiological subsets varied between 87.1 and 99.4 per cent. In some patients clinical symptoms improved during supportive care and they did not therefore undergo surgical exploration, which may account for the few survivors. Patients who underwent explorative laparotomy for diagnosis only ('open-and-close procedure') died in almost all cases from massive bowel infarction. Some patients in whom intestinal ischaemia was observed in the absence of mesenteric infarction survived.

Following surgical treatment the mortality rates associated with venous thrombosis and arterial embolism improved from 44.0 to 32.1 per cent and from 70.1 to 54.1 per cent respectively, whereas the mortality rates of mesenteric arterial thrombosis (77.4 per cent) and non-occlusive mesenteric ischaemia (72.7 per cent) remained poor. Mesenteric revascularization conferred no benefit over resection alone, except in patients in whom acute mesenteric ischaemia was caused by venous thrombosis.

### Discussion

Because of the low incidence and broad spectrum of acute mesenteric ischaemia, randomized or case-control trials are lacking and preclude an analysis with a higher level of evidence than can be extracted from observational data. A quantitative analysis of observational data was therefore performed to assess mortality and prognosis in relation to aetiological causes of acute mesenteric ischaemia over the past four decades. Most of the studies assessed calculated a mortality rate based on data compiled from all aetiological subsets

taken together. This has the drawback of obscuring differences in clinical presentation and characteristics, diagnostic investigation, disease progression, mortality and response to therapeutic modalities that are specific to disease aetiology. Despite the limitations and careful interpretation of observational data, the results of this quantitative analysis of individual aetiological subsets show clearly the better prognosis of acute mesenteric venous thrombosis compared with arterial causes of acute mesenteric ischaemia; the better prognosis of mesenteric arterial embolism compared with arterial thrombosis and non-occlusive ischaemia; the improved prognosis of venous thrombosis and arterial embolism following surgical treatment while the mortality rate associated with mesenteric arterial thrombosis and non-occlusive mesenteric ischaemia remained poor; and the improved overall survival of patients with acute mesenteric ischaemia over the past four decades.

The survival benefit for patients with acute mesenteric venous thrombosis compared with those suffering arterial mesenteric occlusion may be explained by the usually limited segmental bowel infarction and the need for limited intestinal resection<sup>80</sup>. Whether acute arterial occlusion is of embolic or thrombotic origin may not influence the timing of diagnosis and outcome; however, the difference in mortality rate after surgery for embolic and thrombotic arterial occlusion (54.1 *versus* 77.4 per cent respectively) indicates a far worse prognosis for mesenteric arterial thrombosis. Mesenteric arterial thrombosis is most often superimposed on atherosclerosis at the origin of the superior mesenteric artery. The poor prognosis of patients with mesenteric arterial thrombosis is most likely due to the proximal location of the occlusion that is associated with extensive bowel infarction and the need for extended bowel resection<sup>47</sup>. In contrast, mesenteric arterial embolism occludes the mesenteric vessels at different levels of the mesenteric vascular tree resulting in varying areas of mesenteric infarction<sup>47</sup>. For non-occlusive mesenteric ischaemia, revascularization procedures are not appropriate because the underlying problem is a low-flow state. The mortality rate of these patients will remain high in spite of supportive circulatory treatment and bowel resection, if the underlying cause of mesenteric hypoperfusion is not treated adequately.

In addition to distinguishing disease aetiology, therapeutic modalities were categorized into non-surgical or surgical treatment groups. Non-surgical treatment (supportive care and diagnostic explorative laparotomy) was followed by death in almost all cases, the diagnosis being established when the patient was in a moribund state or



at autopsy. This emphasizes the importance of early diagnosis and treatment<sup>1,5</sup>. Regarding surgical treatment, two findings were notable. As expected, the mortality rates were lower after surgical than non-surgical treatment. However, the mortality from mesenteric arterial thrombosis and non-occlusive mesenteric ischaemia remained high even after surgical treatment (resection, revascularization or both) (77.4 and 72.7 per cent respectively), whereas the in-hospital mortality rate associated with arterial embolism and venous thrombosis had decreased to 54.1 and 32.1 per cent respectively.

Patients who underwent revascularization with or without resection appeared to fare even worse than patients who underwent bowel resection only. This might be explained by the varying prognosis of different revascularization procedures. Relatively small revascularization procedures, for example thrombectomy or embolectomy without subsequent bowel resection, are undertaken when the disease is diagnosed early and there is no transmural bowel necrosis, and may therefore be associated with decreased mortality. On the other hand, large revascularization procedures, such as aortoiliac–mesenteric bypass surgery, are used when there is intestinal vascular insufficiency and may result in increased mortality. Unfortunately, incomplete data made it impossible to distinguish between the various revascularization procedures.

Whether advances in diagnostic tests and therapeutic strategies have improved survival over time is difficult to determine, in part because of the infrequency of acute mesenteric ischaemia and the paucity of data regarding outcome. Over the past decade reviews and expert opinion have disagreed as to whether improvements in mortality from acute mesenteric ischaemia have occurred<sup>1</sup>. However, in several studies data encompassing two inclusion periods showed improved survival<sup>63,72,81</sup>. Furthermore, investigation of each aetiological subset in this study, using weighted mortality rates, demonstrated a declining trend in mortality over the past four decades. Whether this trend derives from publication bias, improvements in treatment strategy or from early diagnosis remains a matter of debate. There is no doubt that early diagnosis decreases mortality<sup>54,58,67,68,71</sup>. The authors were unable to obtain data from published studies on patient and doctor delay, and its relation to mortality. Diagnosis is still often delayed, mainly as a result of the non-specific nature of clinical symptoms during the early phase of acute mesenteric ischaemia and limitations in current diagnostic techniques<sup>82</sup>. The declining mortality of acute mesenteric ischaemia over the past four decades is therefore probably attributable to better management of the disease, with improvements in

surgical interventions and perioperative and postoperative supportive intensive care.

Survival after acute mesenteric ischaemia varied between the different aetiological subsets. The mortality rate after surgical treatment of arterial embolism and venous thrombosis has improved whereas that after surgery for arterial thrombosis and non-occlusive ischaemia remains poor. Although the statement offered by Cokkinis more than 75 years ago may to some degree still apply, there is now room for more optimism and it might be said that 'the diagnosis of acute mesenteric ischaemia is possible, and, in some cases, the treatment is useful and the prognosis hopeful'.

## References

- 1 Brandt LJ, Boley SJ. AGA technical review on intestinal ischemia. American Gastrointestinal Association. *Gastroenterology* 2000; **118**: 954–968.
- 2 Cokkinis AJ. *Mesenteric Vascular Occlusion*. Bailliere, Tindall and Cox: London, 1926.
- 3 McKinsey JF, Gewertz BL. Acute mesenteric ischemia. *Surg Clin North Am* 1997; **77**: 307–318.
- 4 Kazmers A. Operative management of acute mesenteric ischemia. Part 1. *Ann Vasc Surg* 1998; **12**: 187–197.
- 5 Mansour MA. Management of acute mesenteric ischemia. *Arch Surg* 1999; **134**: 328–330.
- 6 Stoney RJ, Cunningham CG. Acute mesenteric ischemia. *Surgery* 1993; **114**: 489–490.
- 7 Stroup DF, Berlin JA, Morton SC, Olkin I, Williamson GD, Rennie D *et al*. Meta-analysis of observational studies in epidemiology: a proposal for reporting. Meta-analysis Of Observational Studies in Epidemiology (MOOSE) group. *JAMA* 2000; **283**: 2008–2012.
- 8 Mantel N, Haenszel W. Statistical aspects of the analysis of data from retrospective studies of disease. *J Natl Cancer Inst* 1959; **22**: 719–748.
- 9 DerSimonian R, Laird N. Meta-analysis in clinical trials. *Control Clin Trials* 1986; **7**: 177–188.
- 10 Liavag I. Acute mesenteric vascular insufficiency. A five-year material, including a case of successful superior mesenteric artery embolectomy. *Acta Chir Scand* 1967; **133**: 631–639.
- 11 Simons BE, Jordan GL Jr. Massive bowel resection. *Am J Surg* 1969; **118**: 953–959.
- 12 Sasser C, Farringer JL Jr, Pickens DR Jr. Superior mesenteric artery embolectomy. *Am Surg* 1971; **37**: 319–327.
- 13 Mattox KL, Guinn GA. Mesenteric infarction. Diagnostic and therapeutic enigmas. *Am J Surg* 1973; **126**: 332–335.
- 14 Richter H, Hain B. Clinical aspects and diagnosis of the occlusion of upper mesenteric arteries. *Chirurg* 1976; **47**: 276–279.
- 15 Goller HR, Kroczeck HG. Mesenteric vascular occlusion. *Chirurg* 1981; **52**: 261–264.
- 16 Hirner A, Haring R, Hofmeister M. Acute mesenteric vascular occlusions. *Chirurg* 1987; **58**: 577–584.

- 17 Paes E, Vollmar JF, Hutschenreiter S, Schoenberg MH, Kubel R, Scholzel E. Mesenteric infarct. New aspects of diagnosis and therapy. *Chirurg* 1988; **59**: 828–835.
- 18 Cohen Solal JL, Hajj G, Damien G. Acute arterial mesenteric ischemia. *J Chir (Paris)* 1993; **130**: 465–466.
- 19 Zan S, Giustetto A, Mastroianni V, Lubrano T. Acute intestinal ischemia. Diagnosis and surgical treatment. *Minerva Chir* 1993; **48**: 543–548.
- 20 Deehan DJ, Heys SD, Brittenden J, Eremin O. Mesenteric ischaemia: prognostic factors and influence of delay upon outcome. *J R Coll Surg Edinb* 1995; **40**: 112–115.
- 21 Wadman M, Syk I, Elmstahl S. Survival after operations for ischaemic bowel disease. *Eur J Surg* 2000; **166**: 872–877.
- 22 Pfeiffer KM, Amstutz E. Anamnesis and symptomatology of mesenteric circulatory disorders. *Schweiz Med Wochenschr* 1966; **96**: 557–560.
- 23 Huber FB. Acute mesenteric vascular occlusion. *Schweiz Med Wochenschr* 1969; **99**: 711–715.
- 24 Pierce GE, Brockenbrough EC. The spectrum of mesenteric infarction. *Am J Surg* 1970; **119**: 233–239.
- 25 Schellerer W, Schellerer K, Decker R, Kliesch G. Acute occlusion of mesenteric arteries. *Munch Med Wochenschr* 1971; **113**: 1415–1419.
- 26 Stallkamp B, Haring R, Tung LC. Diagnosis and therapy of acute occlusion of mesenteric vessels. *Med Welt* 1976; **27**: 984–990.
- 27 Singh RP, Lee ST. Acute mesenteric vascular occlusion: a review of 40 cases. *Int Surg* 1980; **65**: 231–234.
- 28 Klempnauer J, Grothues F, Bektas H, Pichlmayr R. Long-term results after surgery for acute mesenteric ischemia. *Surgery* 1997; **121**: 239–243.
- 29 Delany HM. Prognostic factors in infarction of the intestine. *Surg Gynecol Obstet* 1972; **135**: 253–256.
- 30 Perdue GD Jr, Smith RB III, Dempsey RL. Mesenteric arterial disease. *Am J Gastroenterol* 1972; **58**: 428–434.
- 31 Kwaan JH, Connolly JE. Prevention of intestinal infarction resulting from mesenteric arterial occlusive disease. *Surg Gynecol Obstet* 1983; **157**: 321–324.
- 32 Bapat RD, Aiyer PM, Relekar RG, Nazareth HM, Vora IM, Ramakantan R. Ischemic bowel disease. *Indian J Gastroenterol* 1990; **9**: 19–22.
- 33 Foley MI, Moneta GL, Abou-Zamzam AM Jr, Edwards JM, Taylor LM Jr, Yeager RA *et al.* Revascularization of the superior mesenteric artery alone for treatment of intestinal ischemia. *J Vasc Surg* 2000; **32**: 37–47.
- 34 Cho JS, Carr JA, Jacobsen G, Shephard AD, Nypaver TJ, Reddy DJ. Long-term outcome after mesenteric artery reconstruction: a 37-year experience. *J Vasc Surg* 2002; **35**: 453–460.
- 35 Ottinger LW, Austen WG. A study of 136 patients with mesenteric infarction. *Surg Gynecol Obstet* 1967; **124**: 251–261.
- 36 Schennach W, Dorfmann A. Problem of acute obstruction of the mesenteric arteries. *Thoraxchir Vask Chir* 1972; **20**: 457–462.
- 37 Slater H, Elliott DW. Primary mesenteric infarction. *Am J Surg* 1972; **123**: 309–311.
- 38 Bergan JJ, Dean RH, Conn J Jr, Yao JS. Revascularization in treatment of mesenteric infarction. *Ann Surg* 1975; **182**: 430–438.
- 39 Havia T, Inberg MV. Acute mesenteric vascular occlusion. *Zentralbl Chir* 1975; **100**: 718–722.
- 40 Hansen HJ, Christoffersen JK. Occlusive mesenteric infarction. A retrospective study of 83 cases. *Acta Chir Scand Suppl* 1976; **472**: 103–108.
- 41 Smith JS Jr, Patterson LT. Acute mesenteric infarction. *Am Surg* 1976; **42**: 562–567.
- 42 Boley SJ, Sprayregan S, Siegelman SS, Veith FJ. Initial results from an aggressive roentgenological and surgical approach to acute mesenteric ischemia. *Surgery* 1977; **82**: 848–855.
- 43 Kairaluoma MI, Karkola P, Heikkinen D, Huttunen R, Mokka RE, Larmi TK. Mesenteric infarction. *Am J Surg* 1977; **133**: 188–193.
- 44 Vellar ID, Doyle JC. Acute mesenteric ischaemia. *Aust N Z J Surg* 1977; **47**: 54–61.
- 45 Hertzner NR, Beven EG, Humphries AW. Acute intestinal ischemia. *Am Surg* 1978; **44**: 744–749.
- 46 Krausz MM, Manny J. Acute superior mesenteric arterial occlusion: a plea for early diagnosis. *Surgery* 1978; **83**: 482–485.
- 47 Ottinger LW. The surgical management of acute occlusion of the superior mesenteric artery. *Ann Surg* 1978; **188**: 721–731.
- 48 Rogers DM, Thompson JE, Garrett WV, Talkington CM, Patman RD. Mesenteric vascular problems. A 26-year experience. *Ann Surg* 1982; **195**: 554–565.
- 49 Sachs SM, Morton JH, Schwartz SI. Acute mesenteric ischemia. *Surgery* 1982; **92**: 646–653.
- 50 Andersson R, Parsson H, Isaksson B, Norgren L. Acute intestinal ischemia. A 14-year retrospective investigation. *Acta Chir Scand* 1984; **150**: 217–221.
- 51 Koveker G, Reichow W, Becker HD. Results of therapy of acute mesenteric vascular occlusion. *Langenbecks Arch Chir* 1985; **366**: 536–538.
- 52 Bergan JJ, McCarthy WJ III, Flinn WR, Yao JS. Nontraumatic mesenteric vascular emergencies. *J Vasc Surg* 1987; **5**: 903–909.
- 53 Clavien PA, Muller C, Harder F. Treatment of mesenteric infarction. *Br J Surg* 1987; **74**: 500–503.
- 54 Giulini S, Bonardelli S, Cangiotti L, Floriani M, Cervi GC, Portolani N *et al.* Factors affecting prognosis in acute intestinal ischemia. *Int Angiol* 1987; **6**: 415–420.
- 55 Wilson C, Gupta R, Gilmour DG, Imrie CW. Acute superior mesenteric ischaemia. *Br J Surg* 1987; **74**: 279–281.
- 56 Mishima Y. Acute mesenteric ischemia. *Jpn J Surg* 1988; **18**: 615–619.
- 57 Kach K, Largiader F. Acute mesenteric infarcts – results of surgical therapy. *Helv Chir Acta* 1989; **56**: 23–27.

- 58 Inderbitzi R, Wagner HE, Seiler C, Stirnemann P, Gertsch P. Acute mesenteric ischaemia. *Eur J Surg* 1992; **158**: 123–126.
- 59 Järvinen O, Laurikka J, Salenius JP, Tarkka M. Acute intestinal ischaemia. A review of 214 cases. *Ann Chir Gynaecol* 1994; **83**: 22–25.
- 60 Voltolini F, Pricolo R, Naldini G, Parziale A. Acute mesenteric ischemia. Analysis of 47 cases. *Minerva Chir* 1996; **51**: 285–292.
- 61 Czerny M, Trubel W, Claeys L, Scheuba C, Huk I, Prager M *et al.* Acute mesenteric ischemia. *Zentralbl Chir* 1997; **122**: 538–544.
- 62 Ritz JP, Runkel N, Berger G, Buhr HJ. Prognostic factors in mesenteric infarct. *Zentralbl Chir* 1997; **122**: 332–338.
- 63 Duron JJ, Peyrard P, Boukhtouche S, Farah A, Suc B. Acute mesenteric ischemia: changes in 1985–1995. Surgical Research Associations. *Chirurgie* 1998; **123**: 335–342.
- 64 Urayama H, Ohtake H, Kawakami T, Tsuneyuka Y, Yokoi K, Watanabe Y. Acute mesenteric vascular occlusion: analysis of 39 patients. *Eur J Surg* 1998; **164**: 195–200.
- 65 Mamode N, Pickford I, Leiberman P. Failure to improve outcome in acute mesenteric ischaemia: seven-year review. *Eur J Surg* 1999; **165**: 203–208.
- 66 Endean ED, Barnes SL, Kwolek CJ, Minion DJ, Schwarcz TH, Mentzer RM Jr. Surgical management of thrombotic acute intestinal ischemia. *Ann Surg* 2001; **233**: 801–808.
- 67 Rius X, Escalante JF, Llauro MJ, Jover J, Puig La Calle J. Mesenteric infarction. *World J Surg* 1979; **3**: 489–493.
- 68 Braun L. Acute mesenteric artery occlusion – clinical aspects, therapy, prognosis. *Zentralbl Chir* 1985; **110**: 1527–1536.
- 69 Riemenschneider T, Maier G, Heitland W. Are there differences in prodromal illnesses, symptoms and prognosis for various forms of mesenteric infarct? *Chirurg* 1987; **58**: 823–827.
- 70 Sitges-Serra A, Mas X, Roqueta F, Figueras J, Sanz F. Mesenteric infarction: an analysis of 83 patients with prognostic studies in 44 cases undergoing a massive small-bowel resection. *Br J Surg* 1988; **75**: 544–548.
- 71 Macarone Palmieri R, Massi G, Bertolini R, Caselli A, Sciacca P, Marinozzi S *et al.* Prognostic factors in acute mesenteric ischemia. Experience of 64 cases. *G Chir* 1989; **10**: 562–566.
- 72 Levy PJ, Krausz MM, Manny J. Acute mesenteric ischemia: improved results – a retrospective analysis of ninety-two patients. *Surgery* 1990; **107**: 372–380.
- 73 Bottger T, Schafer W, Junginger T. A prospective study for evaluating postoperative risk and long-term prognosis of mesenteric infarct. *Med Klin* 1991; **86**: 198–203, 228.
- 74 Grothues F, Bektas H, Klempnauer J. Surgical therapy of acute mesenteric ischemia. *Langenbecks Arch Chir* 1996; **381**: 275–282.
- 75 Newman TS, Magnuson TH, Ahrendt SA, Smith-Meek MA, Bender JS. The changing face of mesenteric infarction. *Am Surg* 1998; **64**: 611–616.
- 76 Meyer T, Klein P, Schweiger H, Lang W. How can the prognosis of acute mesenteric artery ischemia be improved? Results of a retrospective analysis. *Zentralbl Chir* 1998; **123**: 230–234.
- 77 Bjorck M, Acosta S, Lindberg F, Troeng T, Bergqvist D. Revascularization of the superior mesenteric artery after acute thromboembolic occlusion. *Br J Surg* 2002; **89**: 923–927.
- 78 Luther B, Moussazadeh K, Muller BT, Francke C, Harms JM, Ernst S *et al.* The acute mesenteric ischemia – not understood or incurable?. *Zentralbl Chir* 2002; **127**: 674–684.
- 79 Park WM, Cherry KJ Jr, Chua HK, Clark RC, Jenkins G, Harmsen WS *et al.* Current results of open revascularization for chronic mesenteric ischemia: a standard for comparison. *J Vasc Surg* 2002; **35**: 853–859.
- 80 Rhee RY, Gloviczki P, Mendonca CT, Petterson TM, Serry RD, Sarr MG *et al.* Mesenteric venous thrombosis: still a lethal disease in the 1990s. *J Vasc Surg* 1994; **20**: 688–697.
- 81 Boley SJ, Feinstein FR, Sammartano R, Brandt LJ, Sprayregen S. New concepts in the management of emboli of the superior mesenteric artery. *Surg Gynecol Obstet* 1981; **153**: 561–569.
- 82 Taylor LM Jr, Moneta GL, Porter JM. Treatment of acute intestinal ischemia caused by arterial occlusions. In *Vascular Surgery* (5th edn), Rutherford RB (ed), vol. 2 WB Saunders: Philadelphia, 2000; 1512–1519.
